# Supplementary material
Source: MDPI journal article supplement (https://www.mdpi.com/2073-4395/12/3/646)
Supplement: s1 [file s1 › agronomy-1594369-supplementary.pdf]

# The Utilization of Phosphogypsum as a Sustainable Phosphate-Based Fertilizer by *Aspergillus niger*

Da Tian <sup>1,2,3,\*†</sup>, Jingjing Xia <sup>1,2,3,†</sup>, Ningning Zhou <sup>1,2,3</sup>, Meiyue Xu <sup>1,2,3</sup>, Xiang Li <sup>1,2,3</sup>, Liangliang Zhang <sup>1,2,3</sup>, Shuhua Du <sup>4</sup> and Hongjian Gao <sup>1,2,3,\*</sup>

<sup>1</sup> Anhui Province Key Laboratory of Farmland Ecological Conservation and Pollution Prevention, College of Resources and Environment, Anhui Agricultural University, Hefei 230036, China

<sup>2</sup> Key Laboratory of JiangHuai Arable Land Resources Protection and Eco-Restoration, Ministry of Natural Resources P.R.C., Anhui Agricultural University, Hefei 230036, China

<sup>3</sup> Research Centre of Phosphorus Efficient Utilization and Water Environment Protection along the Yangtze River Economic Belt, Anhui Agricultural University, Hefei 230036, China

<sup>4</sup> Anhui Provincial Institute of Geological Experiment, The Ministry of Land and Resources P.R.C. Hefei Mineral Resources Supervision and Testing Center, Hefei 230036, China

\* Correspondence: tianda@ahau.edu.cn; hjgao@ahau.edu.cn

† These authors contributed equally to this work.

### List of Supplemental Tables

**Table S1.** The pH, total P concentration, water-soluble P concentration and Pb concentration in PG.

**Table S2.** The pH value and water-soluble P concentration between TCP and PG treatments (no ANG) during incubation (3, 5, 7 days).

**Table S3.** The physical and chemical properties of Shajiang black soil.

**Table S1.** The pH, total P concentration, water-soluble P concentration and Pb concentration in PG.

|    | pH   | Total P concentration<br>(mg/g) | Water-soluble P concentration<br>(mg/g) | Pb concentration<br>(mg/g) |
|----|------|---------------------------------|-----------------------------------------|----------------------------|
| PG | 3.72 | 24.81                           | 3.67                                    | 1.49                       |

**Table S2.** The pH value and water-soluble P concentration between TCP and PG treatments (no ANG) during incubation (3, 5, 7 days).

| Incubation time<br>(day) | TCP     |                                        | PG      |                                        |
|--------------------------|---------|----------------------------------------|---------|----------------------------------------|
|                          | pH      | Water-soluble P<br>concentration(mg/g) | pH      | Water-soluble P<br>concentration(mg/g) |
| 3 days                   | 4.4±0.1 | 338.7±39.6                             | 4.0±0.3 | 8.5±1.6                                |
| 5 days                   | 5.2±0.8 | 274.2±45.0                             | 3.9±0.2 | 11.5±3.8                               |
| 7 days                   | 5.5±1.4 | 667.7±18.0                             | 2.9±0.1 | 28.0±1.8                               |

The pH was measured by pH meter. The water-soluble P was measured by ICP-OES. The error bars represent the standard deviations of three replicates. The significant differences among the treatments were identified by Tukey's honestly significant difference test ( $p < 0.05$ ) via one-way ANOVA.

**Table S3.** The physical and chemical properties of Shajiang black soil.

| Type |                     | Soil texture (g/kg) |      |      | Organic matter (g/kg) | Total nitrogen (g/kg) | Available nitrogen (mg/kg) | Available phosphorus (mg/kg) | Available potassium (mg/kg) | pH  |
|------|---------------------|---------------------|------|------|-----------------------|-----------------------|----------------------------|------------------------------|-----------------------------|-----|
|      |                     | Clay                | Loam | Sand |                       |                       |                            |                              |                             |     |
| Soil | Shajiang black soil | 321                 | 265  | 414  | 18.1                  | 1.1                   | 146.5                      | 12.8                         | 128.6                       | 7.8 |
